# Supplementary material for: Simultaneous Grafting Polymerization of Acrylic Acid and Silver Aggregates Formation by Direct Reduction Using γ Radiation onto Silicone Surface and Their Antimicrobial Activity and Biocompatibility
Source: MDPI journal article supplement (doi:10.3390/molecules26102859), 2021-05-12
Supplement: s1 [file s1]

**Supplementary material for:**

**Simultaneous grafting polymerization of acrylic acid and silver aggregates formation by direct reduction using g radiation onto silicone surface and their antimicrobial activity and biocompatibility**

Marlene A. Velazco-Medel<sup>1\*</sup>, Luis A. Camacho-Cruz<sup>1</sup>, Héctor Magaña<sup>2</sup>, Kenia Palomino<sup>2</sup> and Emilio Bucio<sup>1\*</sup>

\*Correspondence: ebucio@nucleares.unam.mx (E.B.C.); marlene.velazco@correo.nucleares.unam.mx (M.A.V-M)

**Figure S1:** EWC% for the films in DI water and PBS

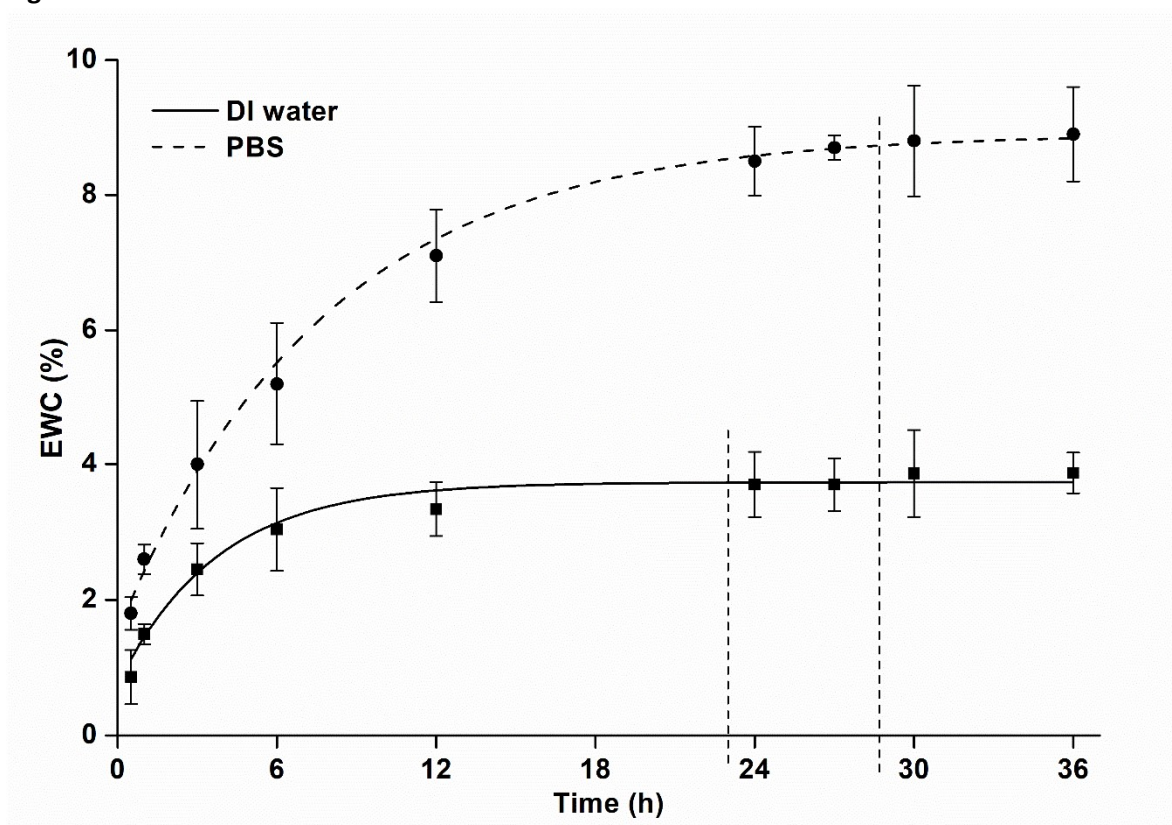

**Figure S2:**  $^{13}\text{C}$  CPMAS SS NMR spectra of the different films.

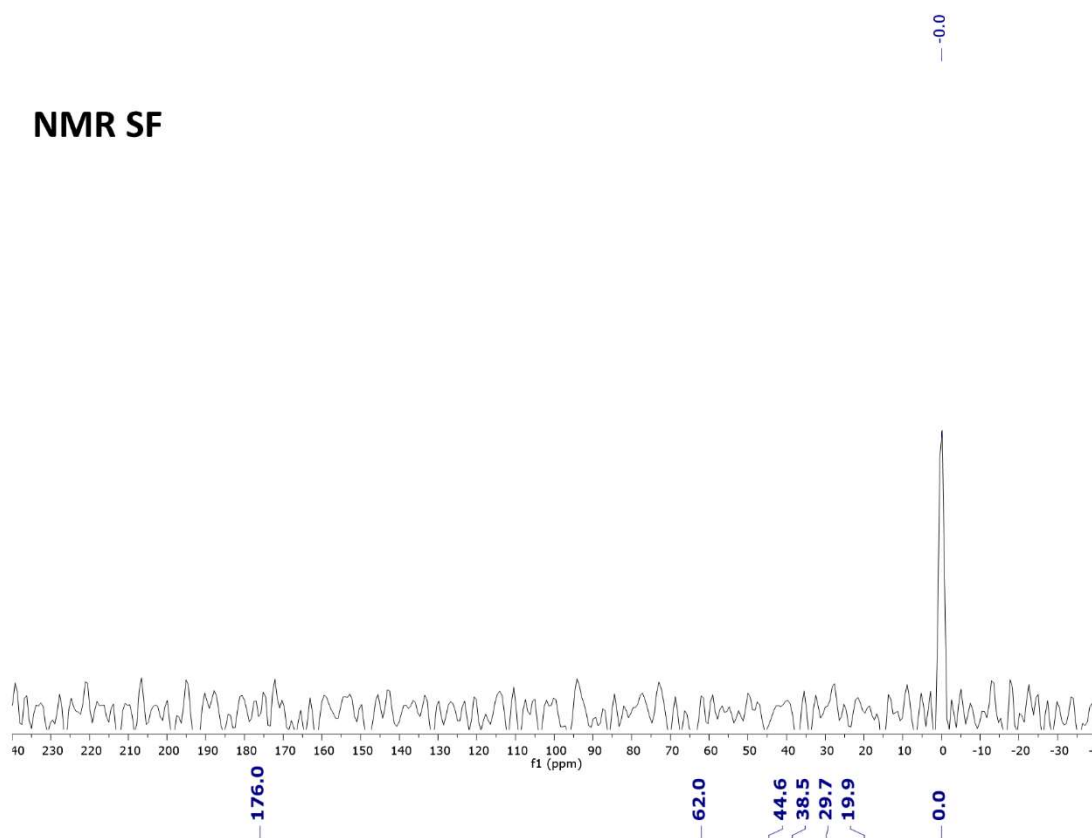

**NMR: SF-*g*-(AAc-*co*-EGDMA)**

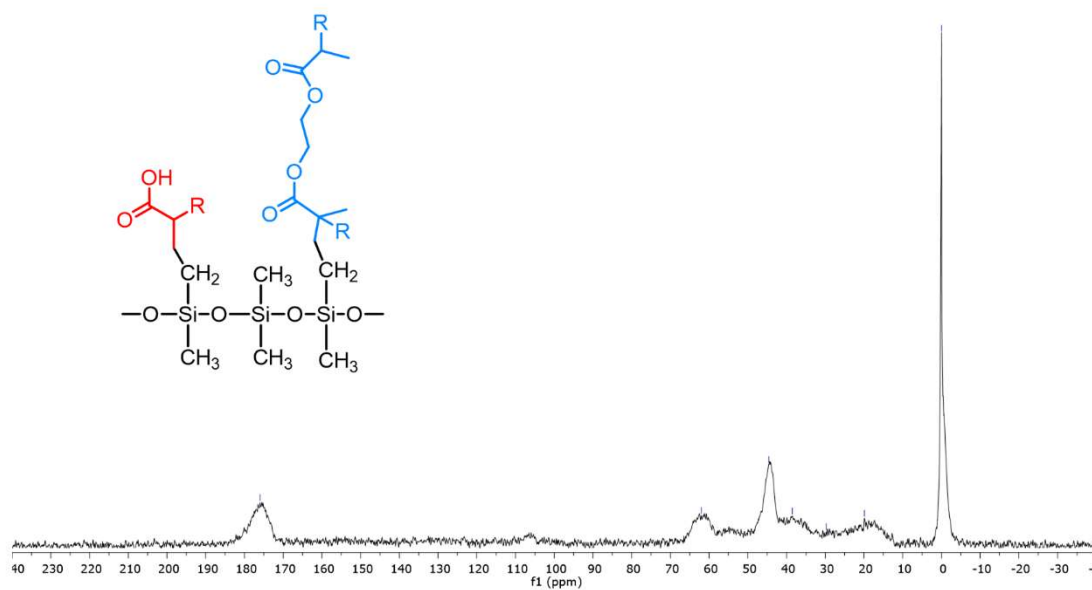

**Figure S3:** FTIR-ATR spectrum of the SF-*g*-(AAc-*co*-EGDMA)+Ag (50 mM) recorded after twelve months

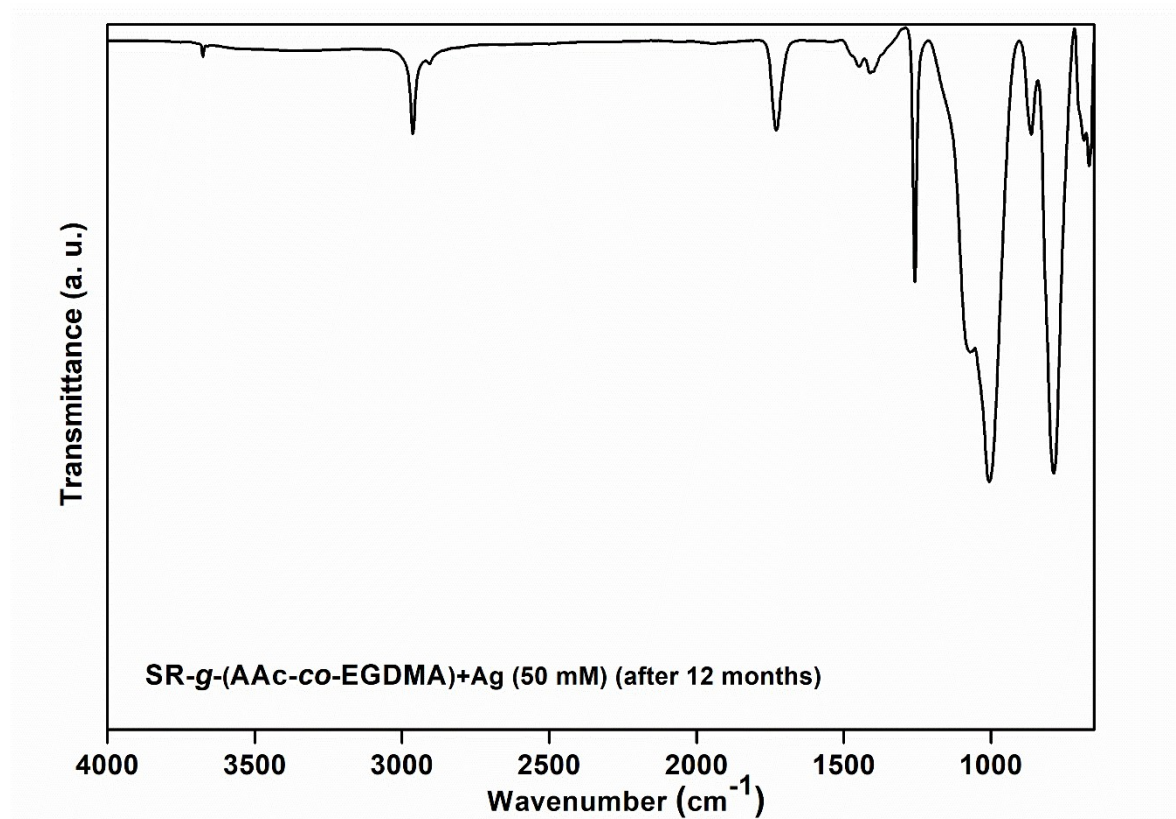

**Figure S4:** UV-Vis spectrum of the SF-*g*-(AAc-*co*-EGDMA)+Ag (50 mM) recorded after twelve months

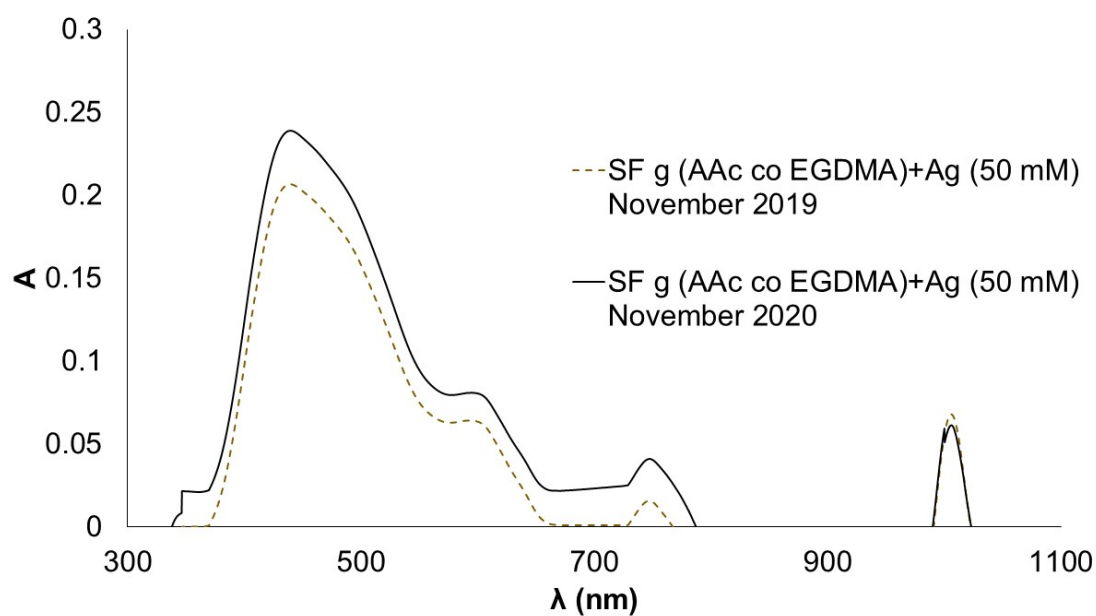

## One-Way ANOVA difference of means hypothesis test with post-hoc test (Tukey)

*S. aureus* growth inhibition

$H_0: \% \text{Growth}_{\text{SF}} = \% \text{Growth}_{\text{SF-g-(AAC-co-EDGMA)}} = \% \text{Growth}_{\text{SF-g-(AAC-co-EDGMA)+Ag}}$

$H_a: \% \text{Growth}_{\text{SF}} \neq \% \text{Growth}_{\text{SF-g-(AAC-co-EDGMA)}} \neq \% \text{Growth}_{\text{SF-g-(AAC-co-EDGMA)+Ag}}$

| ANOVA                                                                                                              |                       |                     |                                 |          |                         |
|--------------------------------------------------------------------------------------------------------------------|-----------------------|---------------------|---------------------------------|----------|-------------------------|
| Sample                                                                                                             | SF                    | SF-g-(AAC-co-EDGMA) | SF-g-(AAC-co-EDGMA)+Ag          |          |                         |
| Repetition 1                                                                                                       | 92.9                  | 89.6                | 34.9                            |          |                         |
| Repetition 2                                                                                                       | 88.8                  | 82.1                | 39.2                            |          |                         |
| Repetition 3                                                                                                       | 94.8                  | 85.7                | 45.4                            |          |                         |
| Mean                                                                                                               | 92.166                | 85.800              | 39.833                          |          |                         |
| St. Deviation                                                                                                      | 3.066                 | 3.651               | 5.278                           |          |                         |
| Source                                                                                                             | Sum of squares        | Degrees of Freedom  | Mean Square                     | F-value  | p-value                 |
| Sample                                                                                                             | 4892.2467             | 2                   | 2446.1233                       | 142.9460 | $8.6854 \times 10^{-6}$ |
| Error                                                                                                              | 102.6733              | 6                   | 17.1122                         |          |                         |
| Total                                                                                                              | 4994.9200             | 8                   |                                 |          |                         |
| Null hypothesis is rejected ( $p < 0.01$ ). Therefore, there is a significant difference between the three samples |                       |                     |                                 |          |                         |
| Post-Hoc                                                                                                           |                       |                     |                                 |          |                         |
| Sample pair                                                                                                        | Tukey HSD Q statistic | Tukey HSD p-value   | Tukey HSD interference          |          |                         |
| SF and SF-g-(AAC-co-EDGMA)                                                                                         | 2.6658                | 0.22255             | Insignificant ( $p \geq 0.05$ ) |          |                         |
| SF and SF-g-(AAC-co-EDGMA) + Ag                                                                                    | 21.9122               | 0.0010053           | Significant ( $p < 0.01$ )      |          |                         |
| SF-g-(AAC-co-EDGMA) and SF-g-(AAC-co-EDGMA)+ Ag                                                                    | 19.2464               | 0.0010053           | Significant ( $p < 0.01$ )      |          |                         |

***E. coli* growth inhibition**

$H_0: \% \text{Growth}_{\text{SF}} = \% \text{Growth}_{\text{SF-g-(AAC-co-EDGMA)}} = \% \text{Growth}_{\text{SF-g-(AAC-co-EDGMA)+Ag}}$

$H_a: \% \text{Growth}_{\text{SF}} \neq \% \text{Growth}_{\text{SF-g-(AAC-co-EDGMA)}} \neq \% \text{Growth}_{\text{SF-g-(AAC-co-EDGMA)+Ag}}$

| ANOVA                                                                                                                   |                |                       |                     |                        |                         |
|-------------------------------------------------------------------------------------------------------------------------|----------------|-----------------------|---------------------|------------------------|-------------------------|
| Sample                                                                                                                  |                | SF                    | SF-g-(AAc-co-EDGMA) | SF-g-(AAc-co-EDGMA)+Ag |                         |
| Repetition 1                                                                                                            |                | 97.1                  | 75.6                | 53.4                   |                         |
| Repetition 2                                                                                                            |                | 99.7                  | 82.1                | 56.9                   |                         |
| Repetition 3                                                                                                            |                | 98.7                  | 80.9                | 61.5                   |                         |
| Mean                                                                                                                    |                | 98.500                | 79.533              | 57.2667                |                         |
| St. Deviation                                                                                                           |                | 1.312                 | 3.459               | 4.062                  |                         |
|                                                                                                                         |                |                       |                     |                        |                         |
| Source                                                                                                                  | Sum of squares | Degrees of Freedom    | Mean Square         | F-value                | p-value                 |
| Sample                                                                                                                  | 2555.7267      | 2                     | 1277.8633           | 126.9961               | 1.2291x10 <sup>-5</sup> |
| Error                                                                                                                   | 60.3733        | 6                     | 10.0622             |                        |                         |
| Total                                                                                                                   | 2616.1000      | 8                     |                     |                        |                         |
| Null hypothesis is <b>rejected (p&lt;0.01)</b> . Therefore, there is a significant difference between the three samples |                |                       |                     |                        |                         |
| Post-Hoc                                                                                                                |                |                       |                     |                        |                         |
| Sample pair                                                                                                             |                | Tukey HSD Q statistic | Tukey HSD p-value   | Tukey HSD interference |                         |
| SF and SF-g-(AAc-co-EDGMA)                                                                                              |                | 10.3563               | 0.0010053           | Significant (p<0.01)   |                         |
| SF and SF-g-(AAc-co-EDGMA) + Ag                                                                                         |                | 22.5145               | 0.0010053           | Significant (p<0.01)   |                         |
| SF-g-(AAc-co-EDGMA) and SF-g-(AAc-co-EDGMA)+ Ag                                                                         |                | 12.1582               | 0.0010053           | Significant (p<0.01)   |                         |

***P. aeruginosa* growth inhibition**

$H_0: \% \text{Growth}_{\text{SF}} = \% \text{Growth}_{\text{SF-g-(AAC-co-EDGMA)}} = \% \text{Growth}_{\text{SF-g-(AAC-co-EDGMA)+Ag}}$

$H_a: \% \text{Growth}_{\text{SF}} \neq \% \text{Growth}_{\text{SF-g-(AAC-co-EDGMA)}} \neq \% \text{Growth}_{\text{SF-g-(AAC-co-EDGMA)+Ag}}$

| ANOVA                                                                                                                                  |                       |                    |                     |         |                                 |
|----------------------------------------------------------------------------------------------------------------------------------------|-----------------------|--------------------|---------------------|---------|---------------------------------|
| Sample                                                                                                                                 | SF                    |                    | SF-g-(AAC-co-EDGMA) |         | SF-g-(AAC-co-EDGMA)+Ag          |
| Repetition 1                                                                                                                           | 92.6                  |                    | 79.6                |         | 73.5                            |
| Repetition 2                                                                                                                           | 83.1                  |                    | 82.8                |         | 66.9                            |
| Repetition 3                                                                                                                           | 85.7                  |                    | 84.9                |         | 68.5                            |
| Mean                                                                                                                                   | 87.133                |                    | 82.433              |         | 69.633                          |
| St. Deviation                                                                                                                          | 4.909                 |                    | 2.668               |         | 3.442                           |
| Source                                                                                                                                 | Sum of squares        | Degrees of Freedom | Mean Square         | F-value | p-value                         |
| Sample                                                                                                                                 | 492.1800              | 2                  | 246.0900            | 17.1372 | 0.0033                          |
| Error                                                                                                                                  | 86.1600               | 6                  | 14.3600             |         |                                 |
| Total                                                                                                                                  | 578.3400              | 8                  |                     |         |                                 |
| Null hypothesis is <b>rejected (<math>p &lt; 0.01</math>)</b> . Therefore, there is a significant difference between the three samples |                       |                    |                     |         |                                 |
| Post-Hoc                                                                                                                               |                       |                    |                     |         |                                 |
| Sample pair                                                                                                                            | Tukey HSD Q statistic |                    | Tukey HSD p-value   |         | Tukey HSD interference          |
| SF and SF-g-(AAC-co-EDGMA)                                                                                                             | 2.1482                |                    | 0.3476896           |         | Insignificant ( $p \geq 0.05$ ) |
| SF and SF-g-(AAC-co-EDGMA) + Ag                                                                                                        | 7.9987                |                    | 0.0031531           |         | Significant ( $p < 0.01$ )      |
| SF-g-(AAC-co-EDGMA) and SF-g-(AAC-co-EDGMA)+ Ag                                                                                        | 5.8505                |                    | 0.0143312           |         | Significant ( $p < 0.05$ )      |

### Cytocompatibility

$H_0$ : % Cell viability<sub>SF</sub> = % Cell viability<sub>SF-g-(AAC-co-EDGMA)</sub> = % Cell viability<sub>SF-g-(AAC-co-EDGMA)+Ag (10 mM)</sub> = % Cell viability<sub>SF-g-(AAC-co-EDGMA)+Ag (20 mM)</sub> = % Cell viability<sub>SF-g-(AAC-co-EDGMA)+Ag (50 mM)</sub>

$H_a$ : % Cell viability<sub>SF</sub>  $\neq$  % Cell viability<sub>SF-g-(AAC-co-EDGMA)</sub>  $\neq$  % Cell viability<sub>SF-g-(AAC-co-EDGMA)+Ag (10 mM)</sub>  $\neq$  % Cell viability<sub>SF-g-(AAC-co-EDGMA)+Ag (20 mM)</sub>  $\neq$  % Cell viability<sub>SF-g-(AAC-co-EDGMA)+Ag (50 mM)</sub>

| ANOVA                                                                                                                   |                |                       |                         |                                    |                                    |                                    |
|-------------------------------------------------------------------------------------------------------------------------|----------------|-----------------------|-------------------------|------------------------------------|------------------------------------|------------------------------------|
| Sample                                                                                                                  | Blank (A)      | SF (B)                | SF-g-(AAc-co-EDGMA) (C) | SF-g-(AAc-co-EDGMA)+Ag (10 mM) (D) | SF-g-(AAc-co-EDGMA)+Ag (20 mM) (E) | SF-g-(AAc-co-EDGMA)+Ag (50 mM) (F) |
| Repetition 1                                                                                                            | 0.482          | 0.458                 | 0.406                   | 0.447                              | 0.395                              | 0.136                              |
| Repetition 2                                                                                                            | 0.491          | 0.479                 | 0.323                   | 0.435                              | 0.409                              | 0.107                              |
| Repetition 3                                                                                                            | 0.468          | 0.478                 | 0.324                   | 0.474                              | 0.267                              | 0.149                              |
| Mean                                                                                                                    | 0.4803         | 0.4717                | 0.3510                  | 0.4520                             | 0.3570                             | 0.1307                             |
| St. Deviation                                                                                                           | 0.0116         | 0.0118                | 0.0476                  | 0.0200                             | 0.0783                             | 0.0215                             |
|                                                                                                                         |                |                       |                         |                                    |                                    |                                    |
| Source                                                                                                                  | Sum of squares | Degrees of Freedom    | Mean Square             | F-value                            | p-value                            |                                    |
| reatment                                                                                                                | 0.2609         | 5                     | 0.0522                  | 32.8524                            | 1.3342x10 <sup>-6</sup>            |                                    |
| error                                                                                                                   | 0.0191         | 12                    | 0.0016                  |                                    |                                    |                                    |
| total                                                                                                                   | 0.2799         | 17                    |                         |                                    |                                    |                                    |
| Null hypothesis is <b>rejected (p&lt;0.01)</b> . Therefore, there is a significant difference between the three samples |                |                       |                         |                                    |                                    |                                    |
| Post-Hoc                                                                                                                |                |                       |                         |                                    |                                    |                                    |
| Sample pair                                                                                                             |                | Tukey HSD Q statistic | Tukey HSD p-value       |                                    | Tukey HSD interference             |                                    |
| A vs B                                                                                                                  |                | 0.3767                | 0.899995                |                                    | Insignificant (p≥0.05)             |                                    |
| A vs C                                                                                                                  |                | 5.6211                | 0.017711                |                                    | Significant (p<0.05)               |                                    |
| A vs D                                                                                                                  |                | 1.2314                | 0.899995                |                                    | Insignificant (p≥0.05)             |                                    |
| A vs E                                                                                                                  |                | 5.3603                | 0.0242                  |                                    | Significant (p<0.05)               |                                    |
| A vs F                                                                                                                  |                | 15.1973               | 0.0010                  |                                    | Significant (p<0.01)               |                                    |
| B vs C                                                                                                                  |                | 5.2444                | 0.027777                |                                    | Significant (p<0.05)               |                                    |
| B vs D                                                                                                                  |                | 0.8548                | 0.899995                |                                    | Insignificant (p≥0.05)             |                                    |
| B vs E                                                                                                                  |                | 4.9837                | 0.037922                |                                    | Significant (p<0.05)               |                                    |
| B vs F                                                                                                                  |                | 14.8206               | 0.001005                |                                    | Significant (p<0.01)               |                                    |
| C vs D                                                                                                                  |                | 4.3897                | 0.076532                |                                    | Insignificant (p≥0.05)             |                                    |
| C vs E                                                                                                                  |                | 0.2608                | 0.899995                |                                    | Insignificant (p≥0.05)             |                                    |
| C vs F                                                                                                                  |                | 9.5762                | 0.001005                |                                    | Significant (p<0.01)               |                                    |
| D vs E                                                                                                                  |                | 4.1289                | 0.103262                |                                    | Insignificant (p≥0.05)             |                                    |
